# Supplementary material for: CTCF and cohesin regulate chromatin loop stability with distinct dynamics
Source: eLife journal article supplement (doi:10.7554/elife.25776), 2017-05-03
Supplement: supp [file elife_poa_e25776_Supplementary_File_2.docx]

Supplementary File 2

Table with primer sequences

This table contains a list of primers used in this study as well as a brief description of the experiment in which they were used.

| Name/description | Sequence (5’-3’) | Experiment |
| --- | --- | --- |
| mESC Halo-mCTCF sgRNA 1: | TGAGGCGGTTGAAGCCATTG | Genome-editing (mESC C87 and C59) |
| mESC Halo-mCTCF sgRNA 2: | GGCGGTTGAAGCCATTGTGG | Genome-editing (mESC C87 and C59) |
| mESC Halo-mCTCF sgRNA 3: | ACTTACCAGAGACGCCGGGA | Genome-editing (mESC C87 and C59) |
| mESC Halo-mCTCF sgRNA 4: | GGCCCCCTTCCCGGCGTCTC | Genome-editing (mESC C87 and C59) |
| mCTCF genome F1 | AGCACTGGTAGTTCTTTGTGGT | Genotyping |
| mCTCF genome R1 | GTTGGCTTCGGAGGCTTCATA | Genotyping |
| Internal Halo F1 | GTCGCGCTGGTCGAAGAATA | Genotyping |
| mCTCF genome F2 | TAGCTTTCTAGTCATGCCCCAC | Genotyping |
| mCTCF genome R2 | AACCTCAGACAGCAGTCCTTC | Genotyping |
| Internal Halo R1 | GGGGTCGAATGGAAAGCCA | Genotyping |
| U2OS Halo-hCTCF sgRNA 1: | TGCAGTCGAAGCCATTGTGG | Genome-editing (U2OS C32) |
| U2OS Halo-hCTCF sgRNA 2: | TGATGCAGTCGAAGCCATTG | Genome-editing (U2OS C32) |
| U2OS Halo-hCTCF sgRNA 3: | AGTTTCGGACTCCTCCACAA | Genome-editing (U2OS C32) |
| U2OS Halo-hCTCF sgRNA 4: | ATAAAGGCAGGGGAAATGGA | Genome-editing (U2OS C32) |
| hCTCF genome F1 | ATCTTGCAGTGTTTCCCTCGG | Genotyping |
| hCTCF genome R1 | TGCCCTCCTCTGTATAACGC | Genotyping |
| hCTCF genome F2 | ACTGGTTCTCCCTCCAATCAGT | Genotyping |
| hCTCF genome R2 | ACGGTACCCACATAACGACCT | Genotyping |
| mESC mRad21-Halo/mRad21-SNAPf sgRNA 1: | CCTCAGATAATATGGAACCG | Genome-editing (mESC C45 and C59) |
| mESC mRad21-Halo/mRad21-SNAPf sgRNA 2: | CCACGGTTCCATATTATCTG | Genome-editing (mESC C45 and C59) |
| mESC mRad21-Halo/mRad21-SNAPf sgRNA 3: | ATCTAGCTCCTCAGATAATA | Genome-editing (mESC C45 and C59) |
| mRad21 genome F1 | ctggagcacccgtgacagttc | Genotyping |
| mRad21 genome R1 | CTGAGGAGTCACGCCACTGT | Genotyping |
| Internal SNAPf F1 | GAGAGCTTTACCCGCCAGG | Genotyping |
| mRad21 genome F2 | GAAGTGTCAAGCCAGGGGTA | Genotyping |
| mRad21 genome R2 | TGCGGTGCATAGCATCAGAG | Genotyping |
| Internal SNAPf R1 | CTGTTCGCACCCAGACAGTT | Genotyping |
| Nanog_pos_for | GCAGAGCCACAGAAGGAATC | ChIP-qPCR |
| Nanog_pos_rev | TTGCCACCTGAAACCACATG | ChIP-qPCR |
| Nanog_neg_for | CTTTGGACAGGCATCGTAGC | ChIP-qPCR |
| Nanog_neg_rev | GCAGTATCTCACCATGCAGC | ChIP-qPCR |
| chr2qC3_pos_for | AAGAACGCTGCTTTCATCCC | ChIP-qPCR |
| chr2qC3_pos_rev | ACAGCACCTAGTCACTCCTG | ChIP-qPCR |
| chr2qC3_neg_for | CACACTCCCCAAACACCAAC | ChIP-qPCR |
| chr2qC3_neg_rev | ACAACCTTAAATCCCTGGCTT | ChIP-qPCR |
| Ctcf_mRNA_for | CGGAACACAATGGCAAGACA | RT-qPCR |
| Ctcf_mRNA_rev | TTTCTACAGCAGGCTCCTCC | RT-qPCR |
| Rad21_mRNA_for | CTTCATGGTCTTCAGCGAGC | RT-qPCR |
| Rad21_mRNA_rev | GTCACTGTACGGCTCTTCCT | RT-qPCR |
| Pou5f1_mRNA_for | CCAGGCAGGAGCACGAGTGG | RT-qPCR |
| Pou5f1_mRNA_rev | CCTGGGACTCCTCGGGAGTTG | RT-qPCR |
| Sox2_mRNA_for | GAGTGGAAACTTTTGTCCGAGA | RT-qPCR |
| Sox2_mRNA_rev | GAAGCGTGTACTTATCCTTCTTCAT | RT-qPCR |
| Nanog_mRNA_for | CCTCAGCCTCCAGCAGATGC | RT-qPCR |
| Nanog_mRNA_rev | CCGCTTGCACTTCATCCTTTG | RT-qPCR |
| Esrrb_mRNA_for | GCACCTGGGCTCTAGTTGC | RT-qPCR |
| Esrrb_mRNA_rev | TACAGTCCTCGTAGCTCTTGC | RT-qPCR |
| Klf4_mRNA_for | CAGTGGTAAGGTTTCTCGCC | RT-qPCR |
| Klf4_mRNA_rev | GCCACCCACACTTGTGACTA | RT-qPCR |
| Zfp42_mRNA_for | TGTCCTCAGGCTGGGTAGTC | RT-qPCR |
| Zfp42_mRNA_rev | TGATTTTCCGACGTATGCAAA | RT-qPCR |
| Gapdh_mRNA_for | TGTGCAGTGCCAGCCTCGTC | RT-qPCR |
| Gapdh_mRNA_rev | TGAAGGGGTCGTTGATGGCAACA | RT-qPCR |
| Tfcp2l1_mRNA_for | CAGCCCGAACACTACAACCAG | RT-qPCR |
| Tfcp2l1_mRNA_rev | CAGCCGGATTTCATACGACTG | RT-qPCR |
