# Supplementary material for: CTCF and cohesin regulate chromatin loop stability with distinct dynamics
Source: eLife. 2017 May 3;6:e25776. doi: 10.7554/eLife.25776 (PMC5446243; doi:10.7554/eLife.25776)
Supplement: Supplementary file 1. — DOI: http://dx.doi.org/10.7554/eLife.25776.022 [file elife-25776-supp1.xlsx]

## Sheet: ThisPaperChIPseq
Supplementary File 1. ChIP-seq libraries generated in this study. Mapped reads are reads with a unique match to the mouse genome (mm10) after running Bowtie aligner. Common and unique peaks (as called by MACS2, using combined inputs as control) are between library replicates. We scored two genomic intervals as overlapping if sharing at least 1 bp. Base pair coverage of overlapping peaks is mean ±…
Dataset	ChIP-seq	Total reads	Mapped reads	% unique alignment	GEO accession	Total peaks*	Common peaks	Unique peaks	% common	% unique	Coverage (%)	Merged files for downstream analyses
RTIP003A	WT_input_3	98697911	71125107	0.720634		na	na	na	na	na	na		MERGED input for RAD21
RTIP001A	WT_input_1	44893257	31265804	0.696448		na	na	na	na	na	na	MERGED input for IgG and CTCF
RTIP002A	WT_input_2	52539928	37006645	0.704353		na	na	na	na	na	na
RTIP001B	WT_IgG_1	36954368	19588302	0.530067		39	30	9	0.769231	0.230769	90.0%±5.06	MERGED
RTIP002B	WT_IgG_2	40521836	27921454	0.689047		40	32	8	0.8	0.2	95.1%±4.61
RTIP002C	WT_RAD21_2	46677286	33238576	0.712093		34093	15727	18366	0.461297	0.538703	63.2%±0.21	MERGED
RTIP003B	WT_RAD21_3	90257463	65272325	0.723179		16875	15808	1067	0.93677	0.0632296	95.8%±0.15
RTIP001D	WT_CTCF_1	44067853	29954938	0.679746		58845	52883	5962	0.898683	0.101317	92.5%±0.12	MERGED
RTIP002D	WT_CTCF_2	45486700	33614400	0.738994		61434	52887	8547	0.860875	0.139125	91.1%±0.13
RTIP003C	C59_input_3	89597577	63919189	0.713403		na	na	na	na	na	na		MERGED input for RAD21
RTIP001E	C59_input_1	45954596	31825935	0.692552		na	na	na	na	na	na	MERGED input for IgG and CTCF
RTIP002E	C59_input_2	55175375	38597287	0.699538		na	na	na	na	na	na
RTIP001F	C59_IgG_1	43250852	18337547	0.423981		80	32	48	0.4	0.6	97.7%±2.09	MERGED
RTIP002F	C59_IgG_2	32737829	22314632	0.681616		51	33	18	0.647059	0.352941	89.8%±5.91
RTIP002G	C59_RAD21_2	37722235	26796321	0.710359		13017	5156	7861	0.396097	0.603903	75.1%±0.47	MERGED
RTIP003D	C59_RAD21_3	95594155	68782487	0.719526		7265	5166	2099	0.711081	0.288919	87.3%±0.43
RTIP001H	C59_CTCF_1	42867237	21883427	0.510493		59242	55675	3567	0.939789	0.0602107	95.8%±0.08	MERGED
RTIP002H	C59_CTCF_2	57292831	42561617	0.742879		67289	55163	12126	0.819792	0.180208	84.3%±0.18
* MACS2 peak calling parameters:
macs2 callpeak -B -t <sample.bam> -c <input1.bam input2.bam> -f BAM -g mm --nomodel --extsize 250
Table S1. Overlap and coverage analyses of CTCF and Rad21 ChIP-seq merged libraries. We scored two genomic intervals as overlapping if sharing at least 1 bp. Base pair coverage of overlapping peaks is mean ± 95% CI.
Dataset	ChIP-seq	Total peaks*	Common peaks	Unique peaks	% common	% unique	Coverage (%)
RTIP002C+RTIP003B	WT_RAD21	33434	16864	16570	0.504397	0.495603	66.6%±0.22
RTIP002G+RTIP003D	C59_RAD21	18325	16927	1398	0.923711	0.0762892	93.5%±0.17
RTIP001D+RTIP002D	WT_CTCF	68077	63905	4172	0.938716	0.0612835	95.9%±0.07
RTIP001H+RTIP002H	C59_CTCF	74374	63458	10916	0.853228	0.146772	87.8%±0.15
RTIP002C+RTIP003B	WT_RAD21	33434	32495	939	0.971915	0.0280852	97.5%±0.08
RTIP001D+RTIP002D	WT_CTCF	68077	32007	36070	0.470159	0.529841	46.2%±0.16
RTIP002G+RTIP003D	C59_RAD21	18325	17710	615	0.966439	0.0335607	98.9%±0.08
RTIP001H+RTIP002H	C59_CTCF	74374	17408	56966	0.23406	0.76594	39.8.7%±0.17
* MACS2 peak calling parameters:
macs2 callpeak -B -t <sample1.bam sample2.bam> -c <input1.bam input2.bam> -f BAM -g mm --nomodel --extsize 250

## Sheet: Published_ChIPseq
Supplementary File 1. Overlap between our ChIP-seq data and published CTCF and RAD21 datasets in murine embryonic stem cells. We used MACS2 for peak calling and scored two genomic intervals as overlapping if sharing at least 1 bp. Base pair coverage of overlapping peaks is mean ± 95% CI
						WT_CTCF					C59_CTCF					WT_RAD21					C59_RAD21
Dataset	PMID	ChIP-seq	GEO accession	SRA run(s)	Total peaks*	Common peaks	Unique peaks	% common	% unique	Coverage (%)	Common peaks	Unique peaks	% common	% unique	Coverage	Common peaks	Unique peaks	% common	% unique	Coverage	Common peaks	Unique peaks	% common	% unique	Coverage
Nitzsche et al., 2011	21589869	RAD21-GFP	GSM591469	SRR065242	18850	17968	882	0.95321	0.0467905	99.0%±0.09	17977	873	0.953687	0.046313	99.2%±0.09	16894	1956	0.896233	0.103767	97.9%±0.12	11981	6869	0.635597	0.364403	91.3%±0.26
Nitzsche et al., 2011	21589869	CTCF-GFP	GSM634247	SRR074390	26123	25171	952	0.963557	0.036443	97.5±0.14	25282	841	0.967806	0.0321939	98%±0.13	19645	6478	0.752019	0.247981	94.1%±0.21	11713	14410	0.448379	0.551621	87.5%±0.33
Handoko et al., 2011	21685913	CTCF	GSM699165	SRR172853/SRR172854	69547	58207	11340	0.836945	0.163055	95.2%±0.08	60696	8851	0.872734	0.127266	96.2%±0.07	32331	37216	0.46488	0.53512	63.0%±0.17	17550	51997	0.252347	0.747653	62.2%±0.22
Shen et al., 2012	22763441	CTCF	GSM723015	SRR207081	38234	37168	1066	0.972119	0.0278809	98.2%±0.14	37448	786	0.979442	0.0205576	98.9%±0.04	26649	11585	0.696997	0.303003	80.6%±0.19	15635	22599	0.408929	0.591071	80.4%±0.25
* MACS2 peak calling parameters:
Nitzsche et al., 2011: macs2 callpeak -B -t <sample.bam> -f BAM -g mm --nomodel --extsize 150
Handoko et al., 2011 - CTCF: macs2 callpeak -B -t <CTCF.bam> -c <input_SRR172859/SRR172860.bam> -f BAM -g mm --nomodel --extsize 250
Shen et al., 2012 - CTCF: macs2 callpeak -B -t <CTCF.bam> -c <input_SRR207088/SRR207089.bam> -f BAM -g mm --nomodel --extsize 250
