# Supplementary figures and images for: CTCF and cohesin regulate chromatin loop stability with distinct dynamics
Source: eLife journal article supplement (doi:10.7554/elife.25776), 2017-05-03

**Figure 2 - Figure Supplement 2**

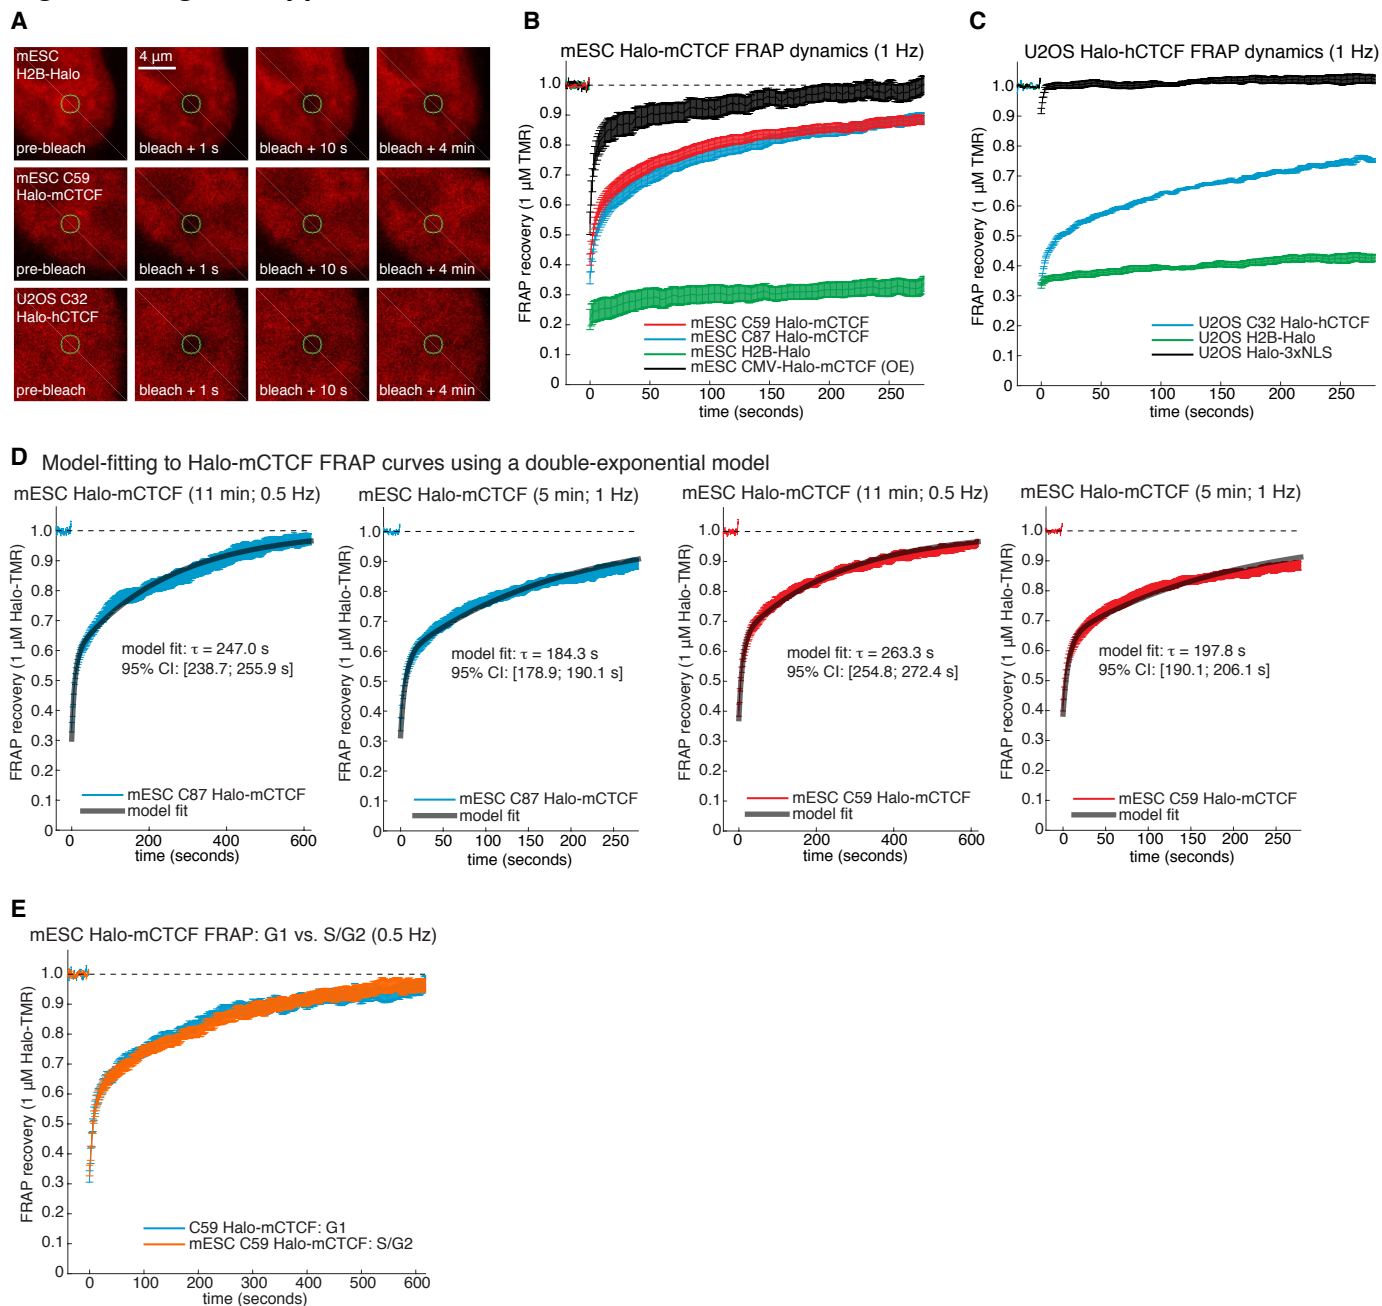

Supplement: supp [file elife-25776-supp-v1.zip]

Figure 1 - Figure Supplement 2

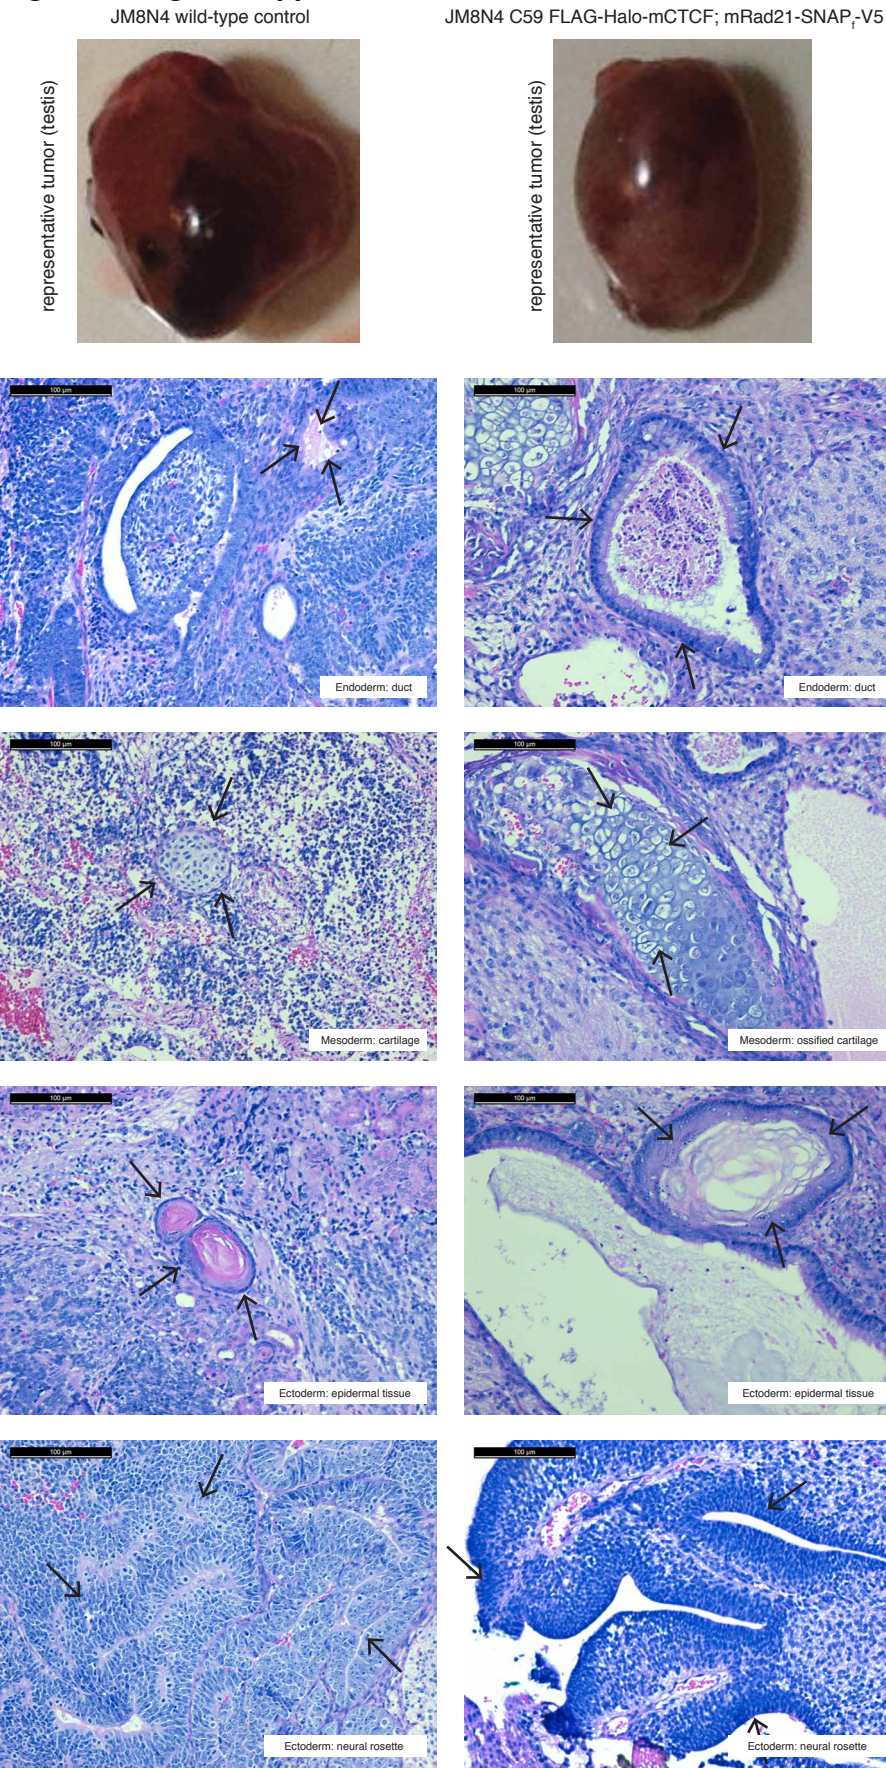

Supplement: supp [file elife-25776-supp-v1.zip]

Figure 4 - Figure Supplement 1

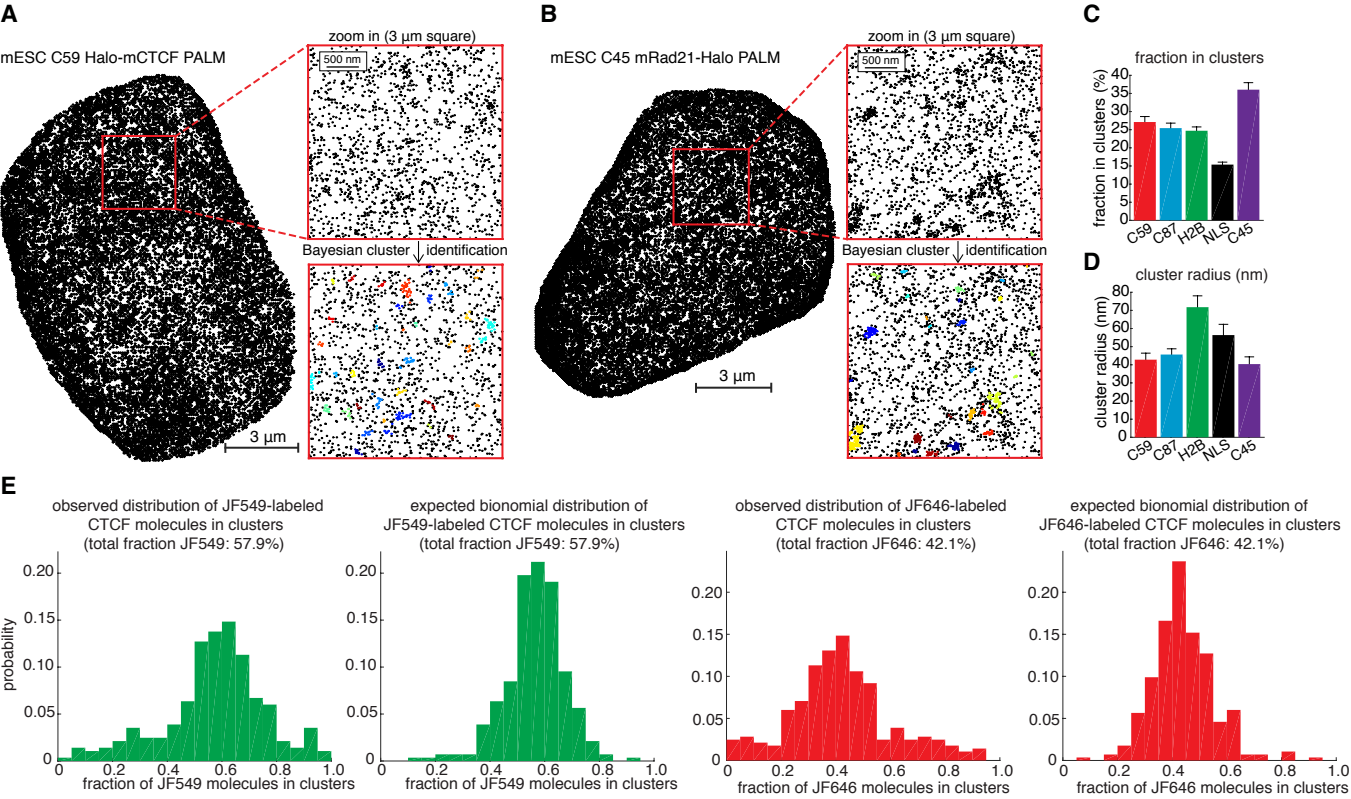

Supplement: supp [file elife-25776-supp-v1.zip]

Figure 1 - Figure Supplement 1

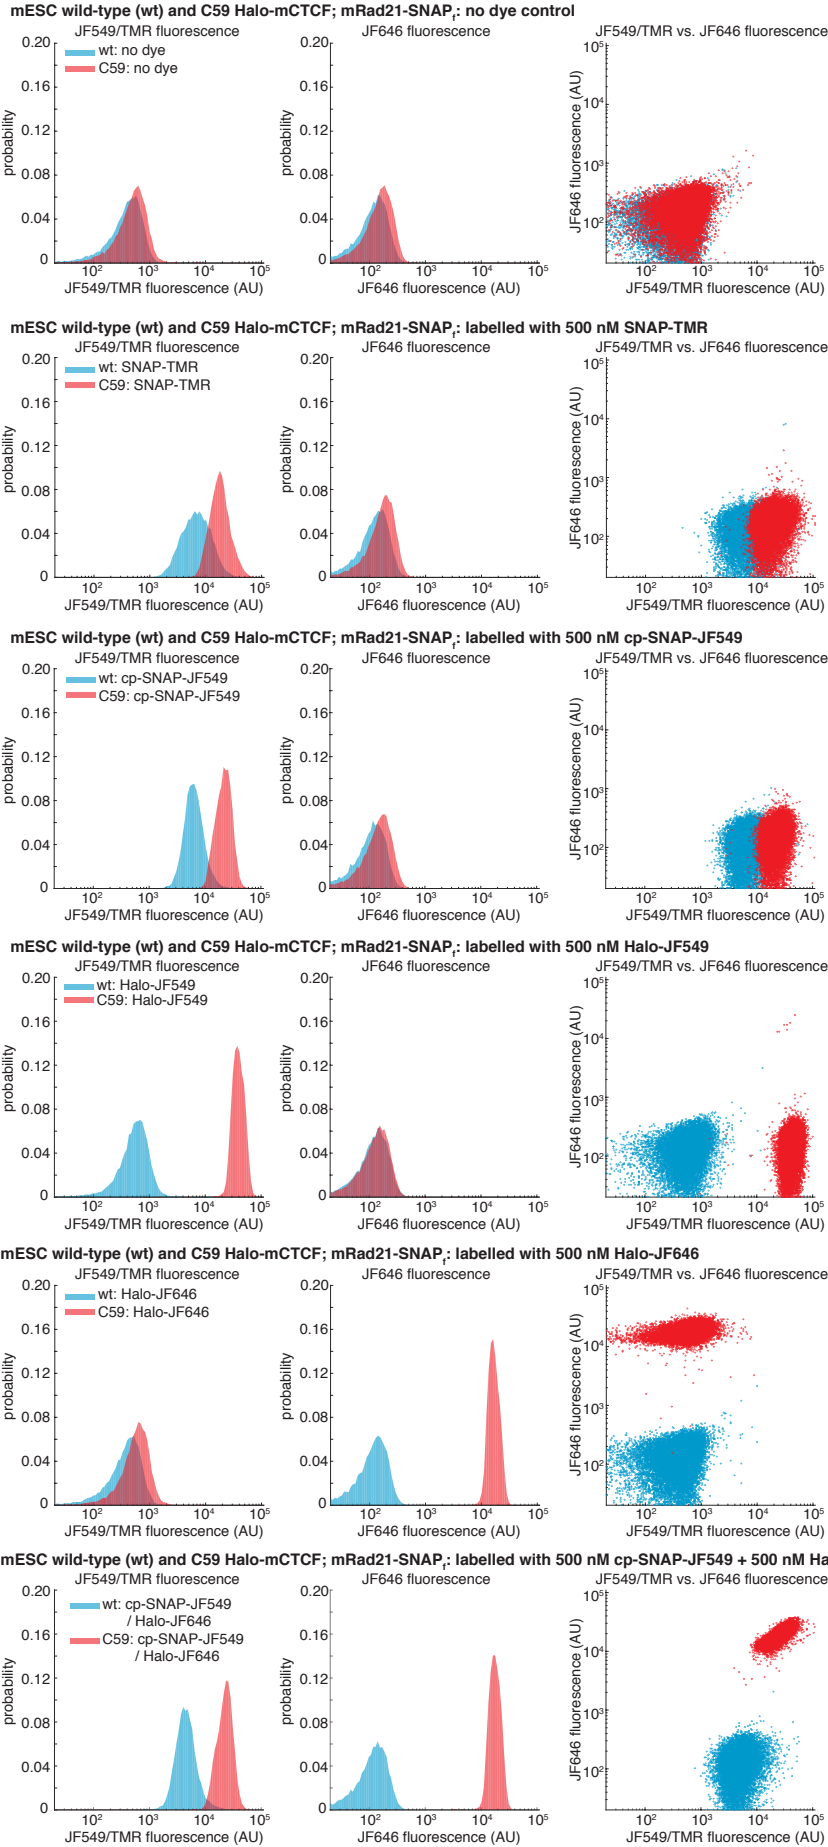

Supplement: supp [file elife-25776-supp-v1.zip]

**Figure 3 - Figure Supplement 1**

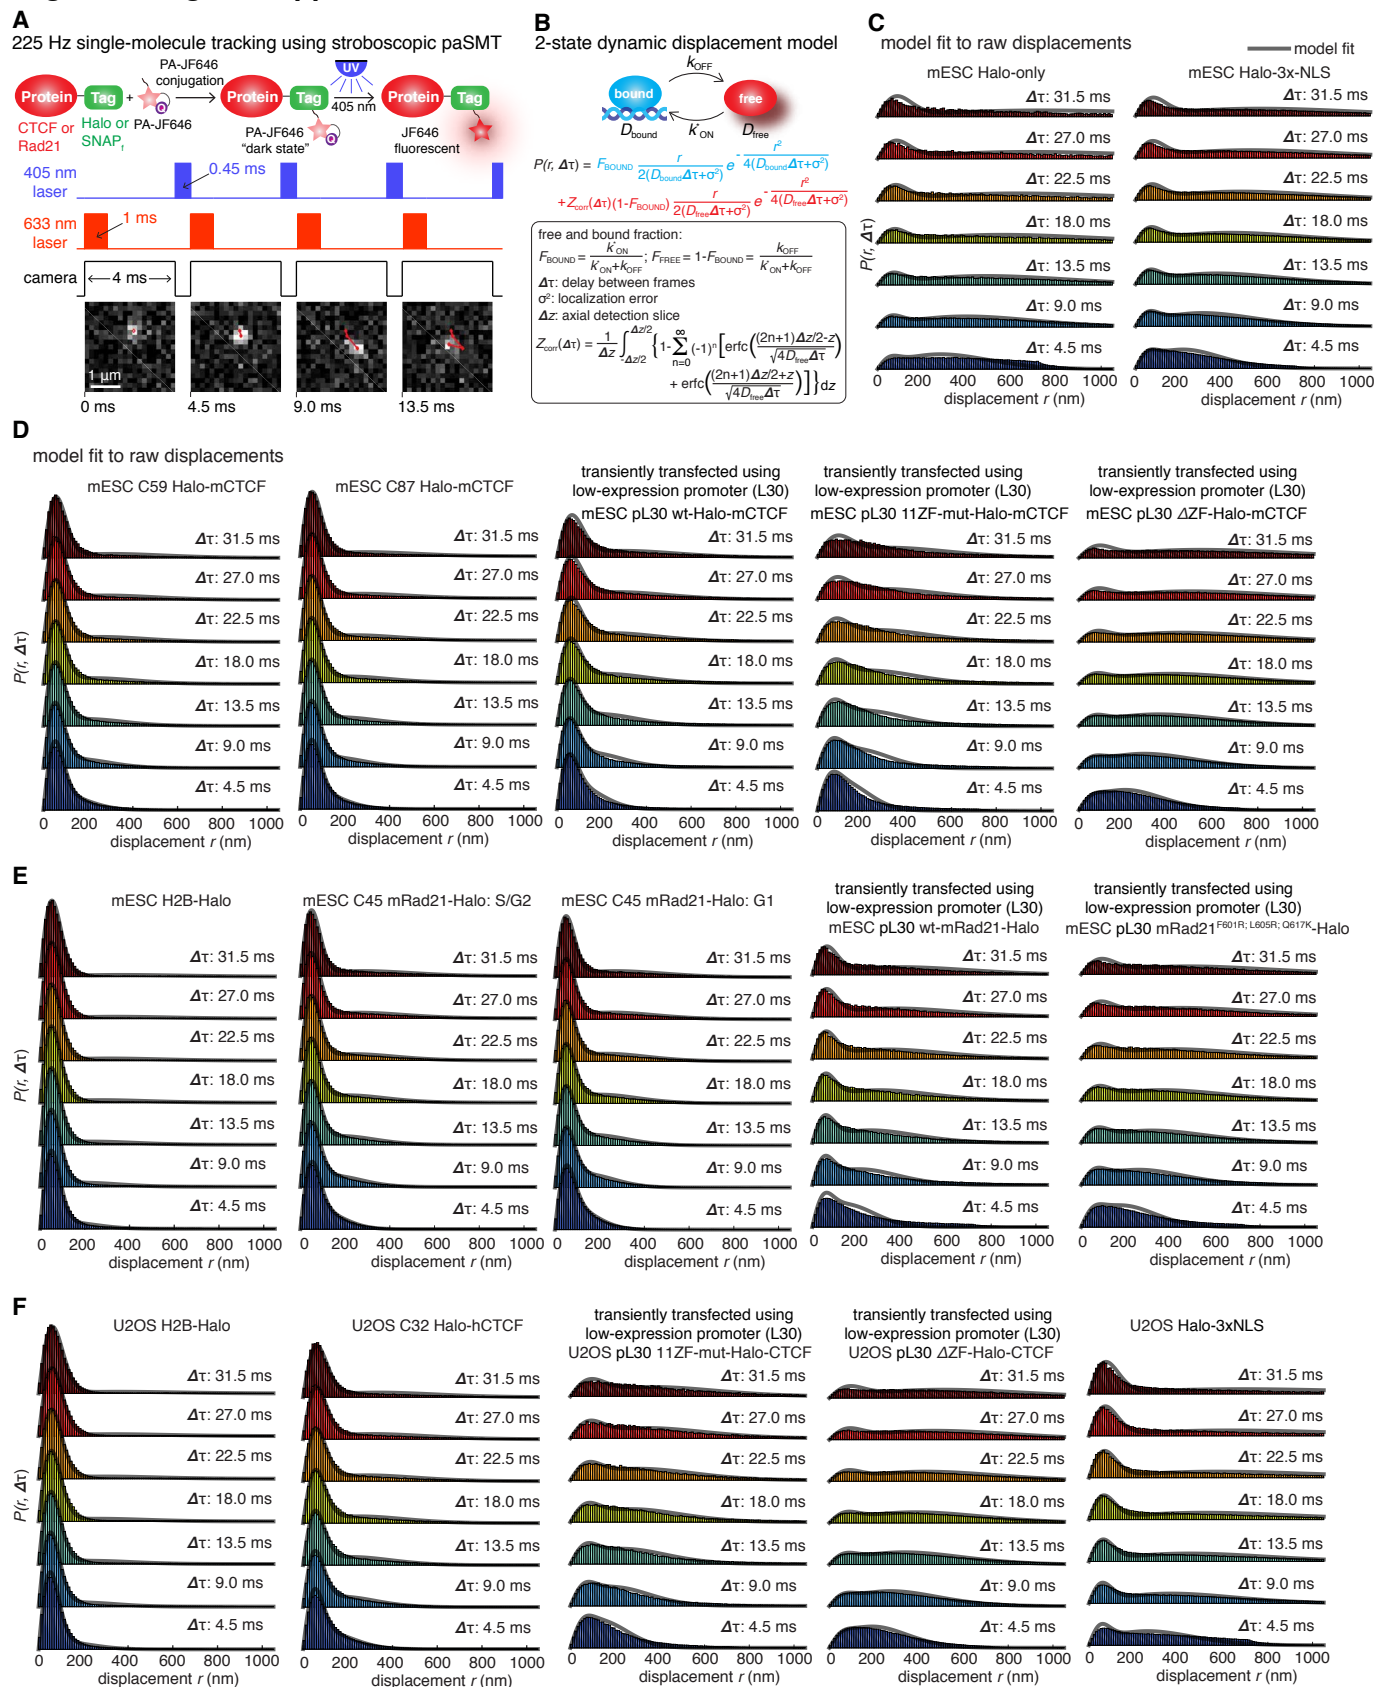

Supplement: supp [file elife-25776-supp-v1.zip]

Figure 2 - Figure Supplement 4

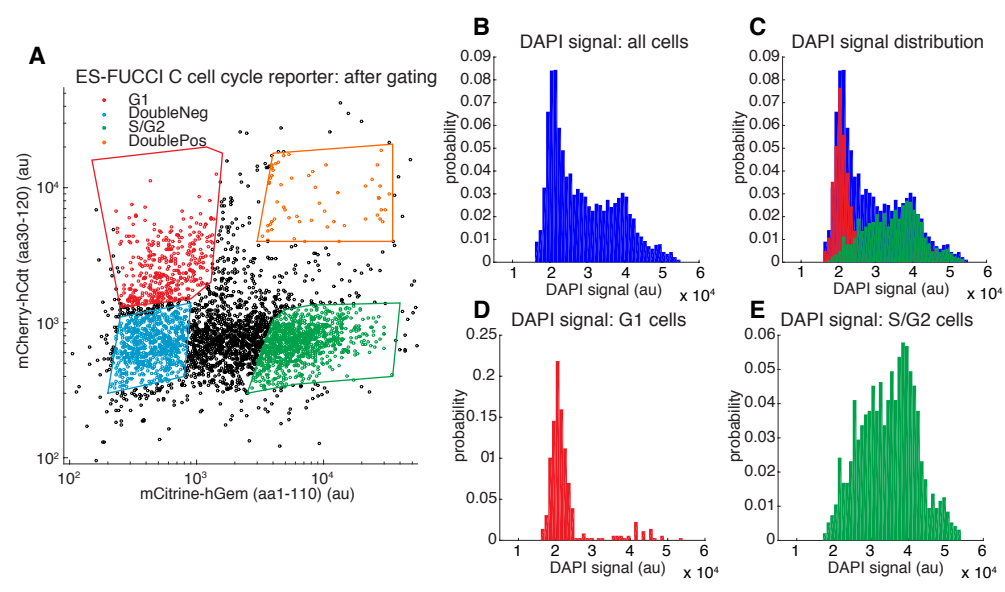

Supplement: supp [file elife-25776-supp-v1.zip]

**Figure 2 - Figure Supplement 3**

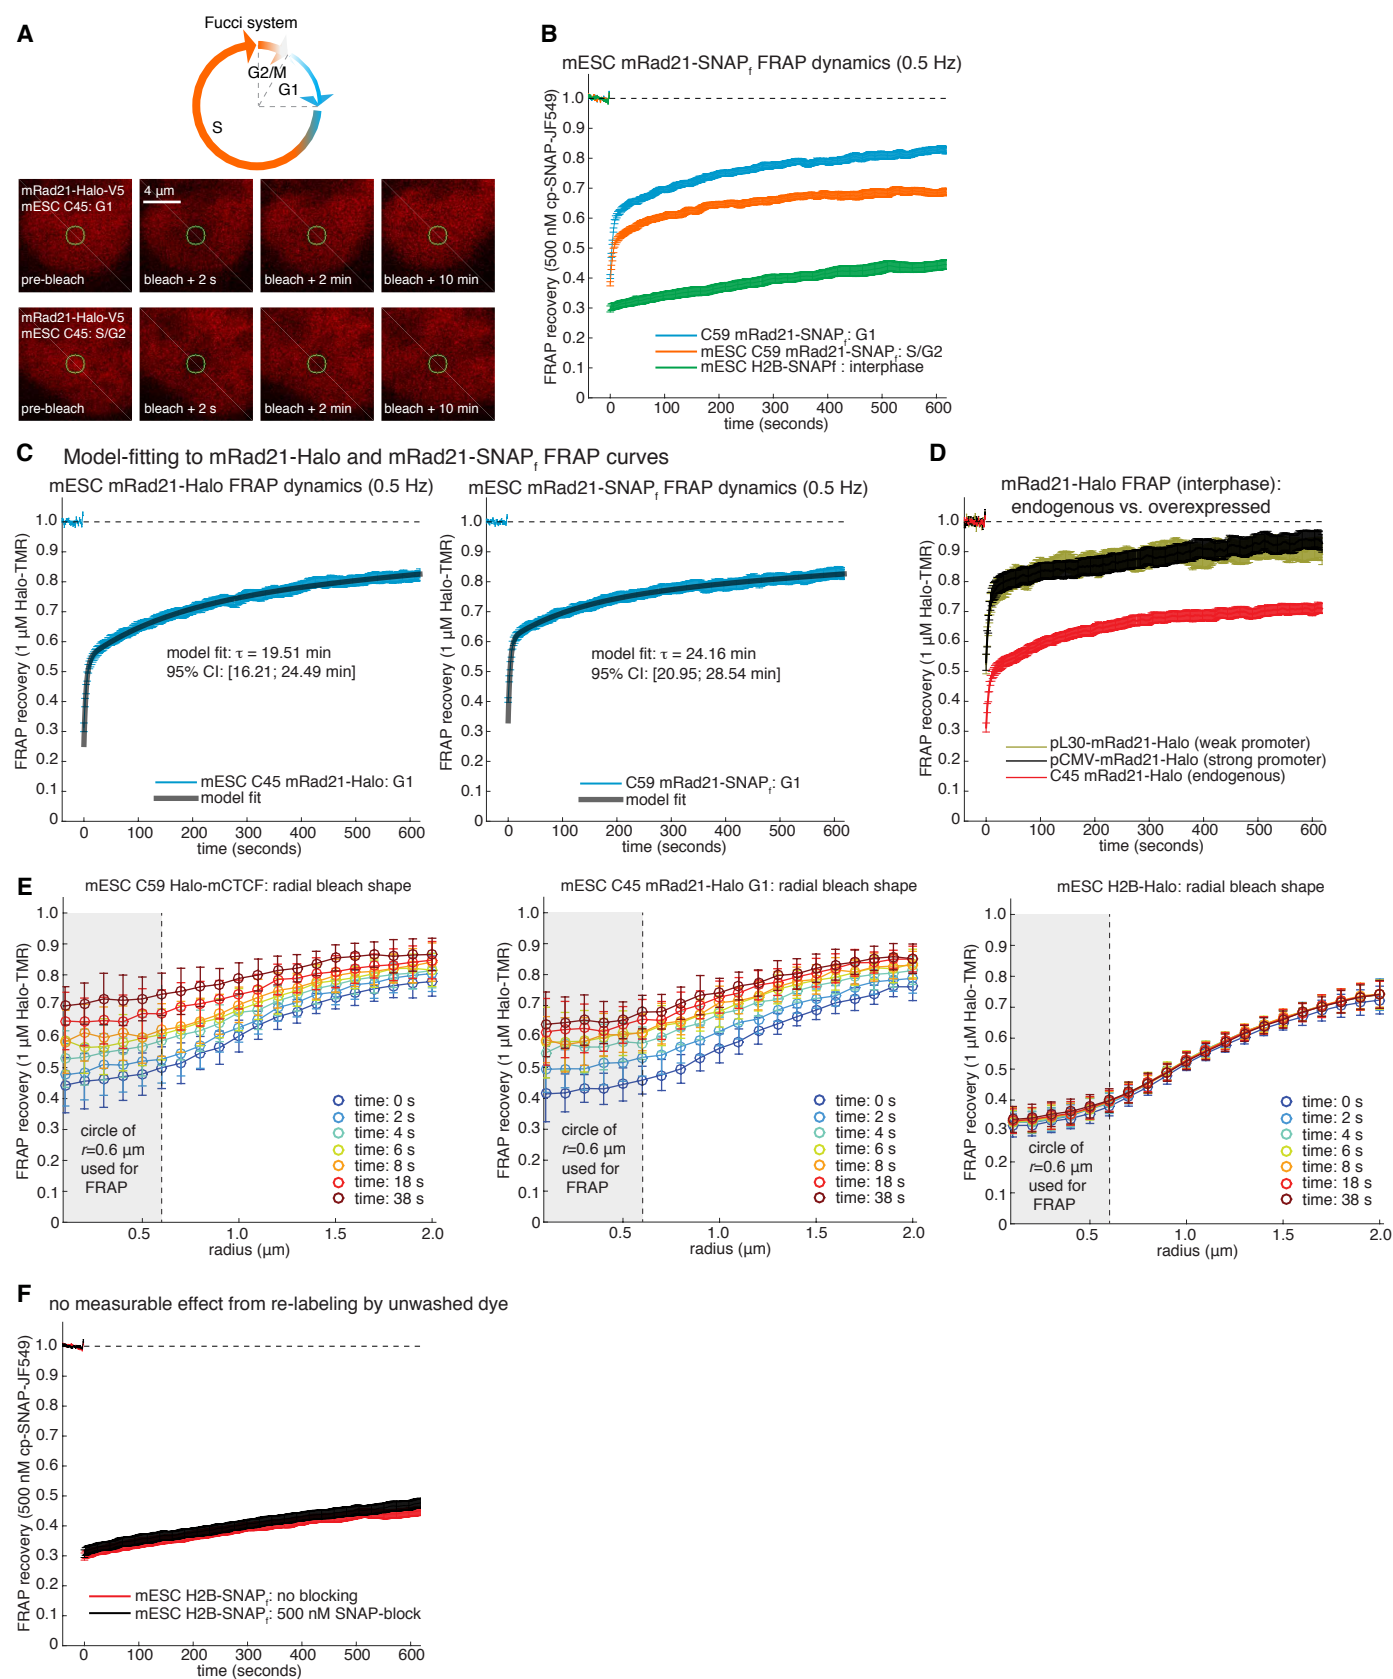

Supplement: supp [file elife-25776-supp-v1.zip]

**Figure 1 - Figure Supplement 5**

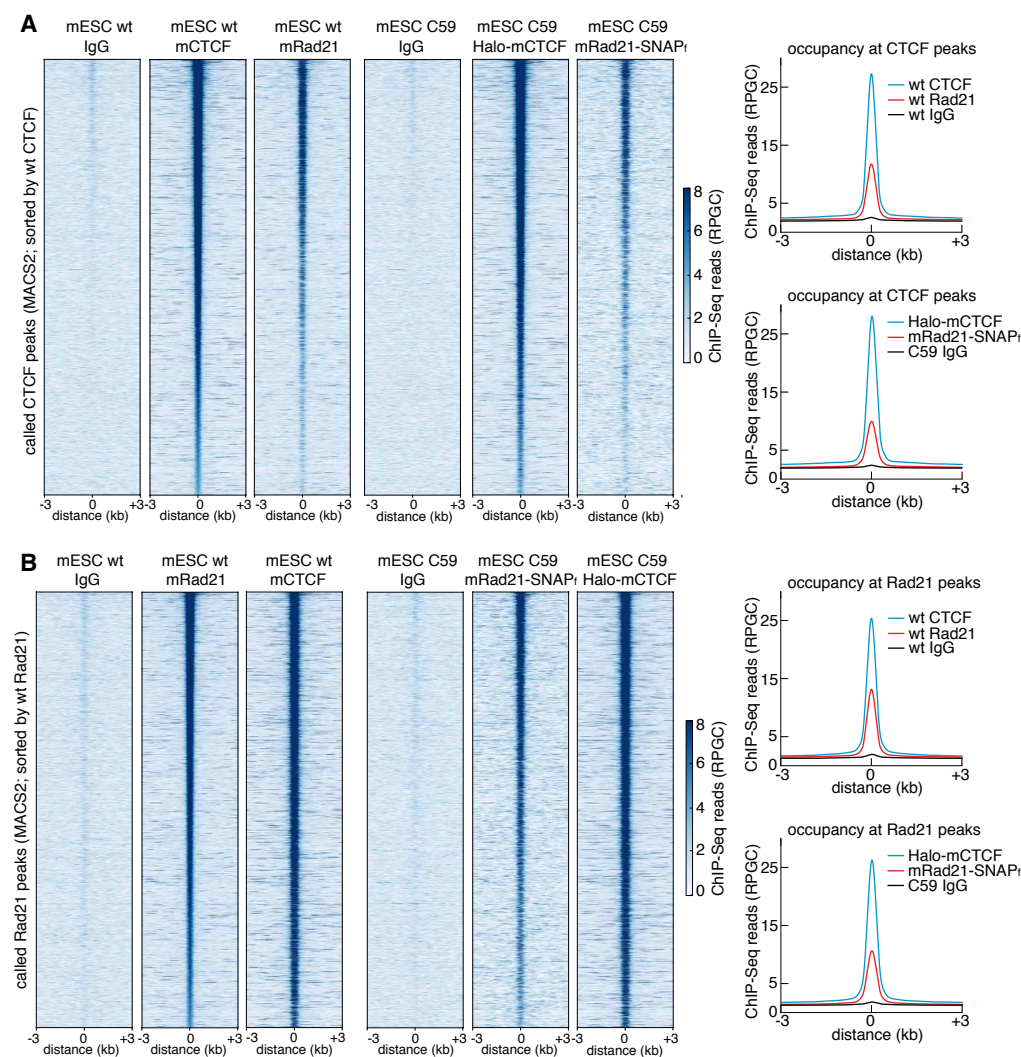

Supplement: supp [file elife-25776-supp-v1.zip]

Figure 2 - Figure Supplement 1

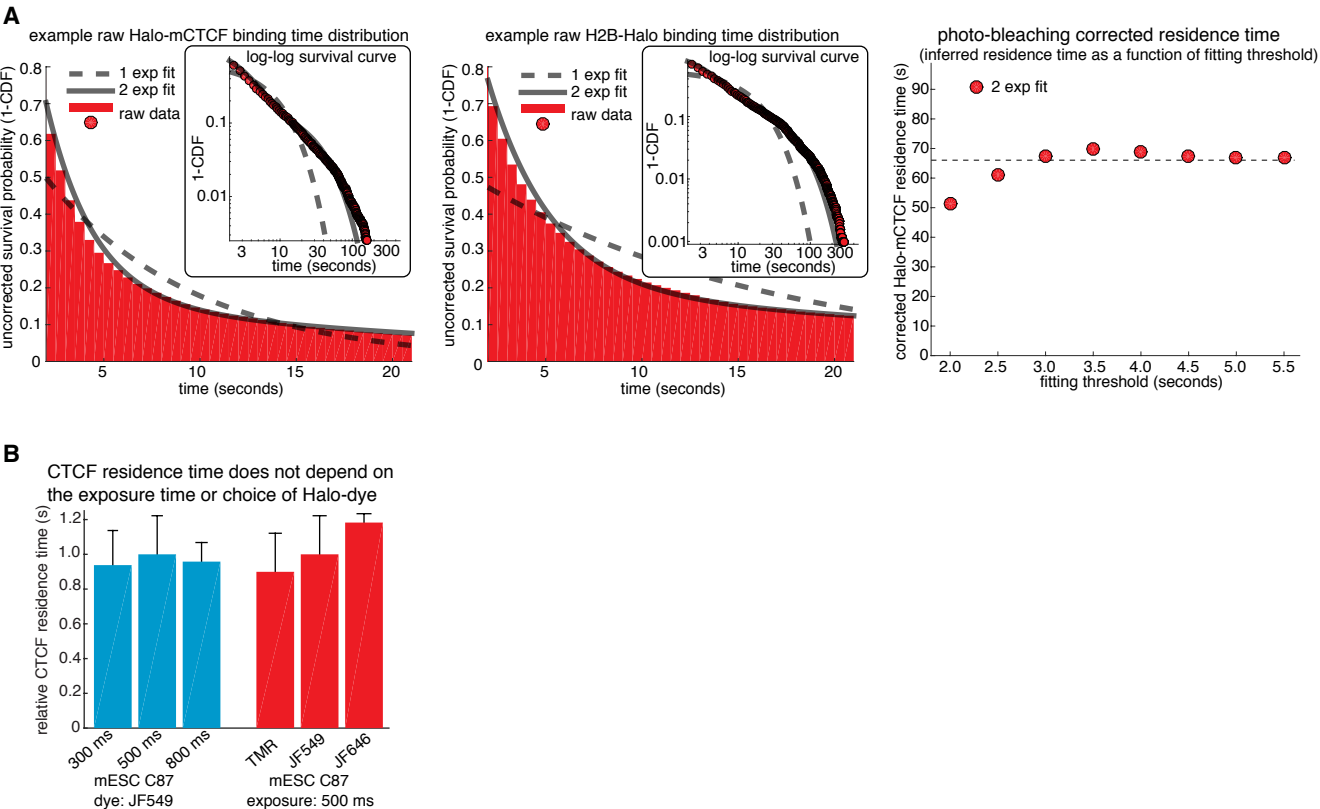

Supplement: supp [file elife-25776-supp-v1.zip]

Figure 1 - Figure Supplement 3

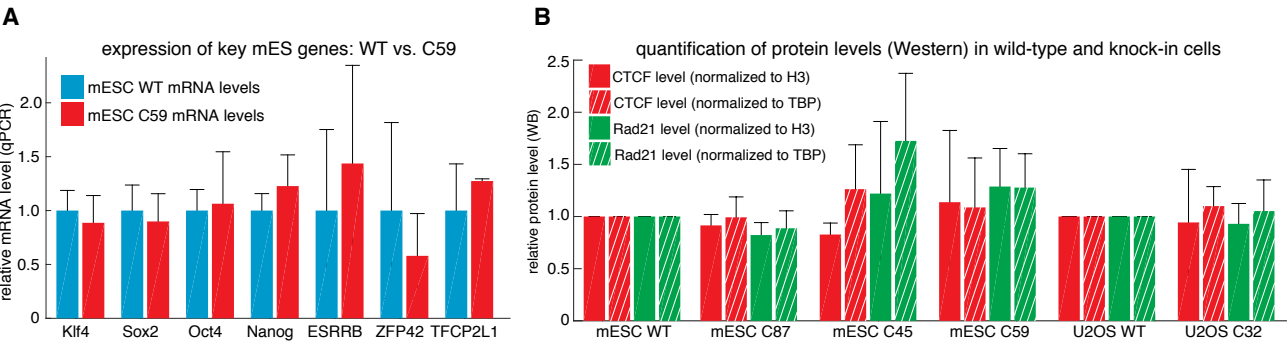

Supplement: supp [file elife-25776-supp-v1.zip]

Figure 1 - Figure Supplement 4

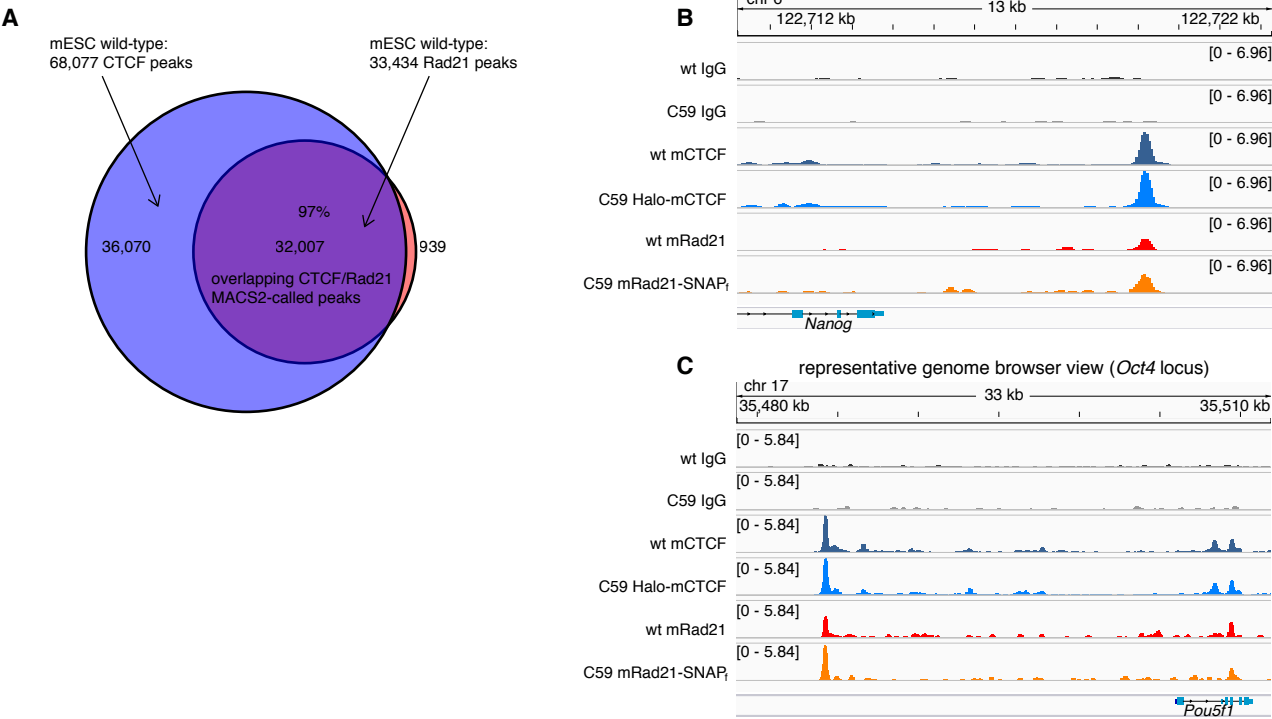

Supplement: supp [file elife-25776-supp-v1.zip]
